# Supplementary material for: Development and Large-Scale Testing of a Novel One-Step Triplex RT-qPCR Assay for Simultaneous Detection of “Neurotropic” Porcine Sapeloviruses, Teschoviruses (Picornaviridae) and Type 3 Porcine Astroviruses (Astroviridae) in Various Samples including Nasal Swabs
Source: MDPI journal article supplement (doi:10.3390/v14030513), 2022-03-02
Supplement: s1 [file s1]

| Target virus<br>(genome region)                          | Reaction<br>type     | Oligonucleotide ID    | Sequence (5' - 3')              | Length<br>(nt) | Tm<br>(°C) | PCR<br>product<br>size (bp) | Reference  |
|----------------------------------------------------------|----------------------|-----------------------|---------------------------------|----------------|------------|-----------------------------|------------|
| Sapelovirus A (3D-RdRp)                                  | RT-PCR<br>(standard) | PSV2-qPCR-Contr-R     | AGC CCT ACC TAC TGG TAC TGA T   | 22             | 64         |                             | this study |
|                                                          |                      | PSV2-qPCR-Contr-F     | GGC TGC TCC GGA ACT AGT GTT     | 21             | 66         | 470                         | this study |
|                                                          | RT-PCR<br>(screen)   | PSV-3Dscreen-6595-R   | CCA AAR GTY TGC TTC ATC ATT AT  | 23             | 59         | 387                         | [10]       |
|                                                          |                      | PSV-3Dscreen-6209-F   | TGT TGA TGC YAC MCT TCC AGA     | 21             | 61         |                             | [10]       |
| Teschovirus A&B<br>(5'UTR)                               | RT-PCR<br>(standard) | PTV-qPCR-Contr-R      | CCA TGA GTC ATA CTC AAC TTC TGC | 24             | 63         |                             | this study |
|                                                          |                      | PTV-qPCR-Contr-F      | CCA GGT ATT GCA CCA ATG GT      | 20             | 63         | 406                         | this study |
|                                                          | RT-PCR<br>(screen)   | Teschovirus-5UTR-Rgen | CCA GCC GCG ACC CTG TCA GGC A   | 22             | 74         | 321                         | [21]       |
|                                                          |                      | Teschovirus-5UTR-Fgen | AGT TTT GGA TTA TCT TGT GCC C   | 22             | 61         |                             | [21]       |
| Porcine astrovirus<br>type 3<br>(ORF1b-ORF2<br>junction) | RT-PCR<br>(standard) | PoAstV3-qPCR-Contr-R  | GCC TGA TTT CTC TTC TCC TCC T   | 22             | 62         |                             | this study |
|                                                          |                      | PoAstV3-qPCR-Contr-F  | TAC AGA TGA GGA ACT CGA GGC A   | 22             | 63         | 591                         | this study |
| Porcine astrovirus<br>type 3 (ORF1b)                     | RT-PCR<br>(screen)   | PoAsV3-Screen-R       | AAC CYT CTC CAC ATA ATT GGC     | 21             | 60         | 356                         | [5]        |
|                                                          |                      | PoAsV3-Screen-F       | GAA GTG TTT ATG CAC ATC AAG A   | 22             | 59         |                             | [5]        |

**Table S1:** List and characteristics of oligonucleotide primers used in this study. F: forward, R: reverse, Tm: melting temperature, RT-PCR (screen): primers used for screening RT-PCR reactions. RT-PCR (standard): primers used for the generation of double-stranded DNA templates used for *in vitro* production of virus-specific RNA standards.
