# Supplementary material for: Development and Large-Scale Testing of a Novel One-Step Triplex RT-qPCR Assay for Simultaneous Detection of “Neurotropic” Porcine Sapeloviruses, Teschoviruses (Picornaviridae) and Type 3 Porcine Astroviruses (Astroviridae) in Various Samples including Nasal Swabs
Source: MDPI journal article supplement (doi:10.3390/v14030513), 2022-03-02
Supplement: s1 [file s1]

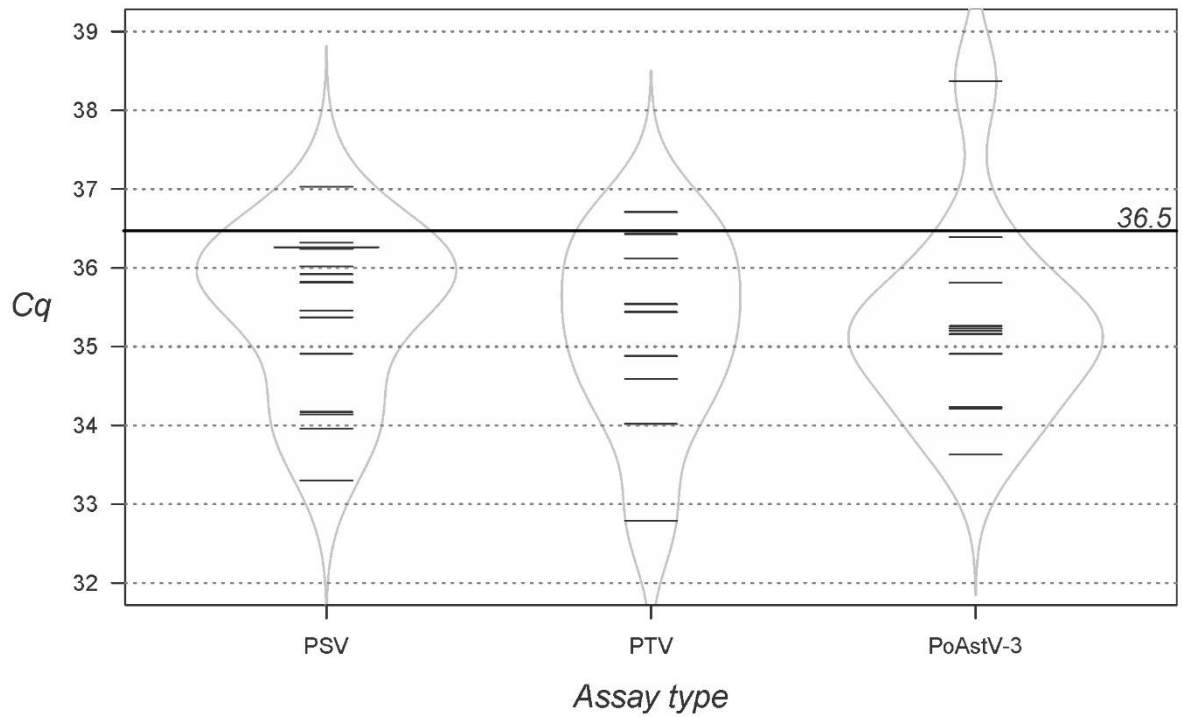

**Figure S1:** Bean plot of Cq values of  $1 \times 10^1$  copies/reaction of RNA standards measured in porcine sapelovirus (PSV), porcine teschovirus (PTV) and porcine astrovirus type 3 (PoAstV-3) RT-qPCR assays. Grey lines represent individual data points; polygons represent the estimated density of the data. Horizontal black line indicates the cut-off Cq value which was arbitrarily set to 36.5. The cut-off Cq threshold was set to be located between the highest and second highest Cq values in case of all three viruses.
