# Supplementary material for: Development and Large-Scale Testing of a Novel One-Step Triplex RT-qPCR Assay for Simultaneous Detection of “Neurotropic” Porcine Sapeloviruses, Teschoviruses (Picornaviridae) and Type 3 Porcine Astroviruses (Astroviridae) in Various Samples including Nasal Swabs
Source: MDPI journal article supplement (doi:10.3390/v14030513), 2022-03-02
Supplement: s1 [file s1]

| Farm ID  | Location      | Date (sampling) | Sample type | Sample ID | Age         | Health status | PSV (RT-PCR) | PSV (tRT-qPCR) | PTV (RT-PCR) | PTV (tRT-qPCR) | PoAstV-3 (RT-PCR) | PoAstV-3 (tRT-qPCR) | References of the samples |
|----------|---------------|-----------------|-------------|-----------|-------------|---------------|--------------|----------------|--------------|----------------|-------------------|---------------------|---------------------------|
| Farm A   | Városföld     | 08/12/ 2016     | Rectal swab | A1        | ≈35 days    | AS            | +            | 21.39          | -            | -              | -                 | -                   | [10]                      |
|          | Városföld     | 08/12/ 2016     | Rectal swab | A2        | ≈35 days    | AS            | +            | 23.14          | +            | 23.27          | -                 | -                   | [10]                      |
|          | Városföld     | 08/12/ 2016     | Rectal swab | A3        | ≈35 days    | AS            | +            | 18.55          | +            | 21.15          | -                 | -                   | [10]                      |
|          | Városföld     | 08/12/ 2016     | Rectal swab | A4        | ≈35 days    | AS            | -            | -              | -            | -              | -                 | -                   | [10]                      |
|          | Városföld     | 08/12/ 2016     | Rectal swab | A5        | ≈35 days    | AS            | +            | 23.20          | -            | -              | -                 | -                   | [10]                      |
| Farm B   | Katymár       | 08/18/ 2016     | Rectal swab | B1        | ≈35 days    | AS            | +            | 20.43          | -            | -              | -                 | -                   | [10]                      |
|          | Katymár       | 08/18/ 2016     | Rectal swab | B2        | ≈35 days    | AS            | +            | 22.66          | +            | 26.16          | -                 | -                   | [10]                      |
|          | Katymár       | 08/18/ 2016     | Rectal swab | B3        | ≈35 days    | AS            | -            | -              | -            | -              | -                 | -                   | [10]                      |
|          | Katymár       | 08/18/ 2016     | Rectal swab | B4        | ≈35 days    | AS            | +            | 20.61          | +            | 22.53          | -                 | -                   | [10]                      |
|          | Katymár       | 08/18/ 2016     | Rectal swab | B5        | ≈35 days    | AS            | +            | 26.02          | -            | -              | -                 | -                   | [10]                      |
| Farm C   | Bácsalmás     | 08/18/ 2016     | Rectal swab | C1        | ≈35 days    | AS            | +            | 19.57          | +            | 26.01          | -                 | -                   | [10]                      |
|          | Bácsalmás     | 08/18/ 2016     | Rectal swab | C2        | ≈35 days    | AS            | +            | 24.93          | +            | 24.33          | -                 | -                   | [10]                      |
|          | Bácsalmás     | 08/18/ 2016     | Rectal swab | C3        | ≈35 days    | AS            | +            | 20.86          | +            | 26.43          | + (Seq-)          | -                   | [10]                      |
|          | Bácsalmás     | 08/18/ 2016     | Rectal swab | C4        | ≈35 days    | AS            | +            | 22.07          | +            | 27.54          | -                 | -                   | [10]                      |
|          | Bácsalmás     | 08/18/ 2016     | Rectal swab | C5        | ≈35 days    | AS            | +            | 19.60          | -            | -              | -                 | -                   | [10]                      |
| Farm D   | Nyíribrony    | 08/10/ 2016     | Rectal swab | D1        | ≈35 days    | AS            | -            | -              | +            | 24.51          | -                 | -                   | [10]                      |
|          | Nyíribrony    | 08/10/ 2016     | Rectal swab | D2        | ≈35 days    | AS            | -            | -              | -            | 26.65 (Seq-)   | -                 | -                   | [10]                      |
|          | Nyíribrony    | 08/10/ 2016     | Rectal swab | D3        | ≈35 days    | AS            | -            | -              | -            | -              | -                 | -                   | [10]                      |
|          | Nyíribrony    | 08/10/ 2016     | Rectal swab | D4        | ≈35 days    | AS            | -            | 30.00 (Seq+)   | -            | -              | -                 | -                   | [10]                      |
|          | Nyíribrony    | 08/10/ 2016     | Rectal swab | D5        | ≈35 days    | AS            | -            | -              | -            | 26.92 (Seq+)   | -                 | -                   | [10]                      |
| Farm TM  | Tázlár        | 01/2013         | Faeces      | TKo-1     | ≈ 11-12 mo. | AS            | -            | -              | -            | -              | -                 | -                   | [10]                      |
|          | Tázlár        | 01/2013         | Faeces      | TKo-2     | ≈ 11-12 mo. | AS            | -            | -              | -            | -              | -                 | -                   | [10]                      |
|          | Tázlár        | 01/2013         | Faeces      | TKo-3     | ≈ 11-12 mo. | AS            | -            | 29.57 (Seq+)   | -            | -              | -                 | -                   | [10]                      |
|          | Tázlár        | 01/2013         | Faeces      | TM-1121   | 7-21 days   | PP            | +            | 20.14          | -            | -              | -                 | -                   | [10]                      |
|          | Tázlár        | 01/2013         | Faeces      | TM-1130   | 7-21 days   | PP            | -            | -              | -            | -              | -                 | -                   | [10]                      |
|          | Tázlár        | 01/2013         | Faeces      | TM-1205   | 7-21 days   | PP            | -            | 20.54 (Seq+)   | -            | -              | +                 | 24.59               | [10]                      |
| Farm NSZ | Nagyszokoly   | 01/23/ 2013     | Faeces      | NSzK1     | ≈ 11-12 mo. | PP            | -            | -              | -            | -              | -                 | -                   | [10]                      |
| Farm KEV | Kevermes      | 09/05/ 2013     | Faeces      | KEV-1     | ≈ 4.5 mo.   | PP            | -            | -              | -            | -              | -                 | -                   | [10]                      |
|          | Kevermes      | 09/05/ 2013     | Faeces      | KEV-2     | ≈ 4.5 mo.   | PP            | -            | -              | -            | -              | -                 | -                   | [10]                      |
|          | Kevermes      | 09/05/ 2013     | Faeces      | KEV-3     | ≈ 4.5 mo.   | PP            | -            | -              | +            | 27.61          | -                 | -                   | [10]                      |
| Farm ZS  | Zsana         | 04/14/ 2013     | Faeces      | Zsana-1   | ≈70 days    | PP            | +            | 23.83          | -            | -              | -                 | -                   | [10]                      |
|          | Zsana         | 04/14/ 2013     | Faeces      | Zsana-2   | ≈70 days    | PP            | +            | 23.25          | -            | 28.08 (Seq+)   | -                 | -                   | [10]                      |
|          | Zsana         | 04/14/ 2013     | Faeces      | Zsana-3   | ≈70 days    | PP            | +            | 23.52          | -            | -              | -                 | -                   | [10]                      |
| Farm BUV | Balmazújváros | 04/24/ 2013     | Faeces      | BUV-1     | 21-35 days  | PP            | +            | 23.01          | +            | 24.32          | + (Seq-)          | -                   | [10]                      |
|          | Balmazújváros | 04/24/ 2013     | Faeces      | BUV-2     | 21-35 days  | PP            | +            | 28.10          | +            | 26.40          | -                 | -                   | [10]                      |
| Farm SZ  | Székelyszabar | 01/2013         | Faeces      | SZ1K      | ≈ 11-12 mo. | AS            | -            | -              | -            | -              | -                 | -                   | [10]                      |
|          | Székelyszabar | 01/2013         | Faeces      | SZ2K      | ≈ 11-12 mo. | AS            | -            | -              | +            | 24.03          | -                 | -                   | [10]                      |
|          | Székelyszabar | 01/2013         | Faeces      | SZK3      | ≈ 11-12 mo. | AS            | -            | -              | +            | 24.01          | -                 | -                   | [10]                      |
|          | Székelyszabar | 01/2013         | Faeces      | SZK4      | ≈ 11-12 mo. | AS            | +            | -              | +            | 27.34          | -                 | -                   | [10]                      |
|          | Székelyszabar | 01/2013         | Faeces      | SZ1M      | 7-21 days   | PP            | +            | 23.61          | +            | 19.69          | -                 | -                   | [10]                      |
|          | Székelyszabar | 01/2013         | Faeces      | SZ2M      | 7-21 days   | PP            | -            | -              | +            | 21.34          | -                 | -                   | [10]                      |
|          | Székelyszabar | 01/2013         | Faeces      | SZ3M      | 7-21 days   | PP            | -            | -              | -            | -              | -                 | -                   | [10]                      |
|          | Székelyszabar | 01/2013         | Faeces      | SZ4M      | 7-21 days   | PP            | +            | 21.25          | -            | -              | -                 | -                   | [10]                      |
| Farm EF  | Egyházásfalu  | 08/17/ 2016     | Faeces      | EF1       | ≈ 3 mo.     | AS            | -            | -              | +            | 23.31          | -                 | -                   | [10]                      |
|          | Egyházásfalu  | 08/17/ 2016     | Faeces      | EF2       | ≈ 3 mo.     | AS            | +            | 26.60          | +            | 22.47          | -                 | -                   | [10]                      |

|            |              |             |             |         |             |    |   |              |   |              |   |              |      |
|------------|--------------|-------------|-------------|---------|-------------|----|---|--------------|---|--------------|---|--------------|------|
|            | Egyházásfalu | 08/17/ 2016 | Faeces      | EF3     | ≈ 3 mo.     | AS | + | 27.60        | + | 26.90        | - | -            | [10] |
|            | Egyházásfalu | 08/17/ 2016 | Faeces      | EF4     | ≈ 3 mo.     | AS | + | 26.62        | - | -            | - | -            | [10] |
|            | Egyházásfalu | 08/17/ 2016 | Faeces      | EF5     | ≈ 3 mo.     | AS | + | (Seq+)       | - | -            | - | -            | [10] |
|            | Egyházásfalu | 08/17/ 2016 | Faeces      | EF6     | ≈ 3 mo.     | AS | + | 26.03        | + | 25.22        | - | -            | [10] |
|            | Egyházásfalu | 08/17/ 2016 | Faeces      | EF7     | ≈ 3 mo.     | AS | + | 25.22        | + | 26.07        | - | -            | [10] |
|            | Egyházásfalu | 08/17/ 2016 | Faeces      | EF8     | ≈ 3 mo.     | AS | + | 19.25        | + | 24.69        | - | -            | [10] |
|            | Egyházásfalu | 08/17/ 2016 | Faeces      | EF9     | ≈ 3 mo.     | AS | + | 25.40        | + | 26.29        | - | -            | [10] |
|            | Egyházásfalu | 08/17/ 2016 | Faeces      | EF10    | ≈ 3 mo.     | AS | + | 29.59        | + | 23.20        | - | -            | [10] |
| Farm EBES  | Ebes         | 01/11/2008  | Faeces      | K1      | ≈ 4 mo.     | AS | + | 29.55        | - | -            | - | -            | [10] |
|            | Ebes         | 01/11/2008  | Faeces      | K2      | ≈ 4 mo.     | AS | + | 27.05        | + | 27.90        | - | -            | [10] |
|            | Ebes         | 01/11/2008  | Faeces      | K3      | ≈ 4 mo.     | AS | - | -            | - | -            | - | -            | [10] |
|            | Ebes         | 01/11/2008  | Faeces      | K4      | ≈ 4 mo.     | AS | - | 31.09 (Seq-) | - | -            | - | -            | [10] |
|            | Ebes         | 01/11/2008  | Faeces      | K5      | ≈ 4 mo.     | AS | + | 30.31        | - | -            | - | -            | [10] |
|            | Ebes         | 01/11/2008  | Faeces      | K7      | ≈ 4 mo.     | AS | + | 28.12        | + | 26.47        | - | -            | [10] |
|            | Ebes         | 01/11/2008  | Faeces      | K10     | ≈ 4 mo.     | AS | + | 30.15        | + | 29.29        | - | -            | [10] |
|            | Ebes         | 01/11/2008  | Faeces      | K21     | ≈10 days    | AS | - | -            | - | -            | - | -            | [10] |
|            | Ebes         | 01/11/2008  | Faeces      | K22     | ≈10 days    | AS | - | -            | - | -            | - | -            | [10] |
|            | Ebes         | 01/11/2008  | Faeces      | K23     | ≈10 days    | AS | - | -            | - | -            | - | -            | [10] |
|            | Ebes         | 01/11/2008  | Faeces      | K24     | ≈10 days    | AS | - | -            | - | -            | - | -            | [10] |
|            | Ebes         | 01/11/2008  | Faeces      | K25     | ≈10 days    | AS | - | -            | + | (Seq+)       | - | -            | [10] |
|            | Ebes         | 01/11/2008  | Faeces      | K26     | ≈10 days    | AS | - | -            | - | -            | - | -            | [10] |
|            | Ebes         | 01/11/2008  | Faeces      | K27     | ≈10 days    | AS | - | -            | - | -            | + | (Seq-)       | [10] |
|            | Ebes         | 01/11/2008  | Faeces      | K28     | ≈10 days    | AS | - | -            | - | -            | - | -            | [10] |
|            | Ebes         | 01/11/2008  | Faeces      | K29     | ≈10 days    | AS | - | -            | - | -            | - | -            | [10] |
|            | Ebes         | 01/11/2008  | Faeces      | K30     | ≈10 days    | AS | + | (Seq+)       | - | -            | - | 24.41 (Seq+) | [10] |
|            | Ebes         | 01/11/2008  | Faeces      | K31     | ≈ 3 mo.     | AS | - | -            | - | -            | - | -            | [10] |
|            | Ebes         | 01/11/2008  | Faeces      | K32     | ≈ 3 mo.     | AS | - | -            | - | -            | - | -            | [10] |
|            | Ebes         | 01/11/2008  | Faeces      | K33     | ≈ 3 mo.     | AS | - | -            | - | -            | - | -            | [10] |
|            | Ebes         | 01/11/2008  | Faeces      | K34     | ≈ 3 mo.     | AS | - | -            | - | -            | - | -            | [10] |
|            | Ebes         | 01/11/2008  | Faeces      | K35     | ≈ 3 mo.     | AS | - | -            | - | -            | - | -            | [10] |
|            | Ebes         | 01/11/2008  | Faeces      | K36     | ≈ 3 mo.     | AS | - | -            | - | -            | - | -            | [10] |
| Farm GD    | Orosháza     | 09/15/ 2016 | Rectal swab | GD_01   | ≈21-25 days | PP | + | 28.63        | - | -            | - | -            | [10] |
|            | Orosháza     | 09/15/ 2016 | Rectal swab | GD_02   | ≈21-25 days | PP | + | 24.51        | + | (Seq+)       | - | -            | [10] |
|            | Orosháza     | 09/15/ 2016 | Rectal swab | GD_03   | ≈21-25 days | PP | + | 35.37        | - | -            | - | -            | [10] |
|            | Orosháza     | 09/15/ 2016 | Rectal swab | GD_04   | ≈21-25 days | PP | - | -            | - | -            | + | (Seq-)       | [10] |
|            | Orosháza     | 09/15/ 2016 | Rectal swab | GD_05   | ≈21-25 days | AS | + | 30.03        | - | 32.10        | - | -            | [10] |
|            | Orosháza     | 09/15/ 2016 | Rectal swab | GD_06   | ≈21-25 days | AS | + | 30.84        | - | -            | - | -            | [10] |
|            | Orosháza     | 09/15/ 2016 | Rectal swab | GD_07   | ≈21-25 days | AS | + | 23.20        | - | -            | - | -            | [10] |
|            | Orosháza     | 09/15/ 2016 | Rectal swab | GD_09   | ≈21-25 days | AS | + | 27.38        | - | -            | - | -            | [10] |
|            | Orosháza     | 09/15/ 2016 | Rectal swab | GD_09   | ≈21-25 days | AS | + | 27.38        | - | -            | - | -            | [10] |
| Farm WB-BF | Bőszénfa     | 04/22/2011  | Faeces      | WB2A    | ≈ 2 mo.     | AS | - | -            | + | 23.34        | - | -            | [28] |
|            | Bőszénfa     | 04/22/2011  | Faeces      | WB2B    | ≈ 2 mo.     | AS | + | 27.01        | + | 18.39        | - | -            | [28] |
|            | Bőszénfa     | 04/22/2011  | Faeces      | WB2C    | ≈ 2 mo.     | AS | + | 24.74        | + | 21.32        | - | -            | [28] |
|            | Bőszénfa     | 04/22/2011  | Faeces      | WB2D    | ≈ 2 mo.     | AS | - | -            | + | 22.94        | - | -            | [28] |
|            | Bőszénfa     | 04/22/2011  | Faeces      | WB2E    | ≈ 2 mo.     | AS | - | -            | - | 28.16 (Seq+) | - | -            | [28] |
|            | Bőszénfa     | 04/22/2011  | Faeces      | WB2E    | ≈ 2 mo.     | AS | - | -            | - | 28.16 (Seq+) | - | -            | [28] |
| Farm WB-TF | Tótfalu      | 17/05/2011  | Faeces      | WB-TF-1 | ≈ 2 mo.     | AS | + | 24.89        | - | -            | - | -            | [28] |
|            | Tótfalu      | 17/05/2011  | Faeces      | WB-TF-2 | ≈ 2 mo.     | AS | - | -            | + | (Seq+)       | - | -            | [28] |
|            | Tótfalu      | 17/05/2011  | Faeces      | WB-TF-3 | ≈ 2 mo.     | AS | - | -            | - | -            | - | -            | [28] |
|            | Tótfalu      | 17/05/2011  | Faeces      | WB-TF-4 | ≈ 2 mo.     | AS | + | 27.43        | - | -            | - | -            | [28] |

|         |          |            |                                   |             |             |    |   |              |   |              |          |              |      |
|---------|----------|------------|-----------------------------------|-------------|-------------|----|---|--------------|---|--------------|----------|--------------|------|
|         | Tótfalu  | 17/05/2011 | Faeces                            | WB-TF-5     | ≈ 2 mo.     | AS | + | 28.68        | - | -            | + (Seq-) | -            | [28] |
|         | Tótfalu  | 17/05/2011 | Faeces                            | WB-TF-6     | ≈ 2 mo.     | AS | - | -            | + | 29.01        | -        | -            | [28] |
|         | Tótfalu  | 17/05/2011 | Faeces                            | WB-TF-7     | ≈ 2 mo.     | AS | - | -            | - | -            | -        | -            | [28] |
|         | Tótfalu  | 17/05/2011 | Faeces                            | WB-TF-8     | ≈ 2 mo.     | AS | - | -            | - | -            | -        | -            | [28] |
|         | Tótfalu  | 17/05/2011 | Faeces                            | WB-TF-9     | ≈ 2 mo.     | AS | - | 30.56 (Seq+) | - | -            | -        | -            | [28] |
|         | Tótfalu  | 17/05/2011 | Faeces                            | WB-TF-10    | ≈ 2 mo.     | AS | + | 23.16        | + | 21.61        | -        | -            | [28] |
|         | Tótfalu  | 17/05/2011 | Faeces                            | WB-TF-11    | ≈ 2 mo.     | AS | - | -            | - | -            | -        | -            | [28] |
| Farm GD | Orosháza | 03/2016    | Brain stem (BS)                   | GD-1-BS     | ≈21-25 days | PP | - | -            | - | -            | +        | 22.39        | [5]  |
|         | Orosháza | 03/2016    | Brain stem (BS)                   | GD-2-BS     | ≈21-25 days | PP | - | -            | - | -            | -        | -            | [5]  |
|         | Orosháza | 07/2016    | Brain stem (BS)                   | GD-3-BS     | ≈21-25 days | PP | - | -            | - | -            | +        | 14.60        | [5]  |
|         | Orosháza | 07/2016    | Brain stem (BS)                   | GD-4-BS     | ≈21-25 days | PP | + | -            | - | -            | +        | 14.82        | [5]  |
|         | Orosháza | 11/2015    | Brain stem (BS)                   | GD-5-BS     | ≈21-25 days | PP | - | -            | - | -            | +        | 16.58        | [5]  |
|         | Orosháza | 07/2016    | Brain stem (BS)                   | GD-6-BS     | ≈35 days    | AS | - | -            | + | -            | -        | -            | [5]  |
|         | Orosháza | 06/2017    | Brain stem (BS)                   | GD-7-BS     | ≈25 days    | AS | - | -            | - | -            | -        | -            | [5]  |
|         | Orosháza | 06/2017    | Brain stem (BS)                   | GD-8-BS     | ≈25 days    | AS | - | -            | - | -            | -        | -            | [5]  |
|         | Orosháza | 06/2017    | Brain stem (BS)                   | GD-9-BS     | ≈25 days    | AS | - | -            | - | -            | -        | -            | [5]  |
|         | Orosháza | 06/2017    | Brain stem (BS)                   | GD-10-BS    | ≈35 days    | AS | - | -            | - | -            | -        | -            | [5]  |
|         | Orosháza | 03/2016    | Spinal cord - lumbar (SC-L)       | GD-1-SC-L   | ≈21-25 days | PP | - | -            | - | -            | +        | 16.39        | [5]  |
|         | Orosháza | 07/2016    | Spinal cord - cervical (SC-C)     | GD-3-SC-C   | ≈21-25 days | PP | - | -            | + | -            | +        | 17.66        | [5]  |
|         | Orosháza | 07/2016    | Spinal cord - thoracic (SC-T)     | GD-3-SC-T   | ≈21-25 days | PP | - | -            | - | -            | +        | 19.82        | [5]  |
|         | Orosháza | 07/2016    | Spinal cord - lumbar (SC-L)       | GD-3-SC-L   | ≈21-25 days | PP | + | -            | - | -            | +        | 14.69        | [5]  |
|         | Orosháza | 07/2016    | Spinal cord - lumbar (SC-L)       | GD-4-SC-L   | ≈21-25 days | PP | - | -            | - | -            | +        | 17.81        | [5]  |
|         | Orosháza | 07/2016    | Spinal cord - cervical (SC-C)     | GD-4-SC-C   | ≈21-25 days | PP | - | -            | - | -            | +        | 18.15        | [5]  |
|         | Orosháza | 07/2016    | Spinal cord - thoracic (SC-T)     | GD-4-SC-T   | ≈21-25 days | PP | - | -            | - | -            | +        | 18.26        | [5]  |
|         | Orosháza | 11/2015    | Spinal cord - lumbar (SC-L)       | GD-5-SC-L   | ≈21-25 days | PP | - | -            | + | -            | +        | 21.55        | [5]  |
|         | Orosháza | 07/2016    | Spinal cord - lumbar (SC-L)       | GD-6-SC-L   | ≈35 days    | AS | - | -            | - | -            | -        | -            | [5]  |
|         | Orosháza | 07/2016    | Intestine - ileum (ILE)           | GD-3-ILE    | ≈21-25 days | PP | + | 30.97        | + | 23.37        | -        | -            | [5]  |
|         | Orosháza | 07/2016    | Intestine - ileum (ILE)           | GD-4-ILE    | ≈21-25 days | PP | + | 31.69        | + | 25.72        | -        | -            | [5]  |
|         | Orosháza | 07/2016    | Intestine - ileum (ILE)           | GD-6-ILE    | ≈35 days    | AS | - | -            | + | 23.21        | -        | -            | [5]  |
|         | Orosháza | 11/2015    | Intestine - ileum (ILE)           | GD-5-ILE    | ≈21-25 days | PP | - | -            | + | -            | -        | 29.44 (Seq+) | [5]  |
|         | Orosháza | 07/2016    | Lung                              | GD-3-LUNG   | ≈21-25 days | PP | - | -            | - | -            | +        | -            | [5]  |
|         | Orosháza | 07/2016    | Nasal mucosa (NM)                 | GD-3-NM     | ≈21-25 days | PP | - | -            | - | -            | +        | 22.75        | [5]  |
|         | Orosháza | 07/2016    | Nasal mucosa (NM)                 | GD-4-NM     | ≈21-25 days | PP | - | -            | + | 27.98        | +        | 22.22        | [5]  |
|         | Orosháza | 07/2016    | Nasal mucosa (NM)                 | GD-6-NM     | ≈35 days    | AS | - | -            | - | -            | -        | -            | [5]  |
|         | Orosháza | 03/2016    | Tonsil (TON)                      | GD-2-TON    | ≈21-25 days | PP | - | -            | + | 31.73        | -        | -            | [5]  |
|         | Orosháza | 07/2016    | Tonsil (TON)                      | GD-3-TON    | ≈21-25 days | PP | + | -            | - | -            | +        | 29.06        | [5]  |
|         | Orosháza | 11/2015    | Tonsil (TON)                      | GD-5-TON    | ≈21-25 days | PP | - | -            | + | 30.77        | +        | 22.75        | [5]  |
|         | Orosháza | 07/2016    | Tonsil (TON)                      | GD-6-TON    | ≈35 days    | AS | - | -            | - | -            | -        | -            | [5]  |
|         | Orosháza | 03/2016    | Lymph node-mesenteric (LN-MES)    | GD-2-LN-MES | ≈21-25 days | PP | + | 31.11        | - | 33.15 (Seq+) | -        | -            | [5]  |
|         | Orosháza | 07/2016    | Lymph node-mesenteric (LN-MES)    | GD-3-LN-MES | ≈21-25 days | PP | - | 31.63 (Seq+) | + | 30.45        | -        | -            | [5]  |
|         | Orosháza | 07/2016    | Lymph node-mesenteric (LN-MES)    | GD-6-LN-MES | ≈35 days    | AS | - | -            | + | 25.27        | -        | -            | [5]  |
|         | Orosháza | 07/2016    | Lymph node-submandibular (LN-SUB) | GD-4-LN-SUB | ≈21-25 days | PP | - | 35.37 (Seq-) | - | -            | +        | -            | [5]  |
|         | Orosháza | 07/2016    | Spleen (SPL)                      | GD-3-SPL    | ≈21-25 days | PP | + | 30.97        | - | -            | -        | -            | [5]  |
|         | Orosháza | 07/2016    | Spleen (SPL)                      | GD-4-SPL    | ≈21-25 days | PP | + | 26.96        | - | -            | -        | -            | [5]  |
|         | Orosháza | 07/2016    | Kidney (KID)                      | GD-3-KID    | ≈21-25 days | PP | + | 28.56        | - | -            | -        | -            | [5]  |
|         | Orosháza | 07/2016    | Liver (LIV)                       | GD-3-LIV    | ≈21-25 days | PP | + | 29.56        | - | -            | -        | -            | [5]  |
|         | Orosháza | 05/2016    | Liver (LIV)                       | GD-4-LIV    | ≈21-25 days | PP | + | 31.65        | - | -            | -        | -            | [5]  |
|         | Orosháza | 07/2016    | Blood (SER)                       | GD-3-SER    | ≈21-25 days | PP | - | -            | - | -            | +        | 20.86        | [5]  |

|  |          |         |             |          |             |    |   |              |   |   |   |   |     |
|--|----------|---------|-------------|----------|-------------|----|---|--------------|---|---|---|---|-----|
|  | Orosháza | 07/2016 | Urine (URI) | GD-3-URI | ≈21-25 days | PP | + | 31.10 (Seq+) | - | - | - | - | [5] |
|--|----------|---------|-------------|----------|-------------|----|---|--------------|---|---|---|---|-----|

**Table S2:** Comparison of the clinical performances of triplex RT-qPCR (tRT-qPCR) and classical RT-PCR screening assays in N=142 archived RNA samples of swine (N=100 faecal/rectal swabs, N=1 urine and N=41 tissue specimens) which includes (but not limited to) known PSV, PTV and PoAstV-3 positives and negatives identified previously by our research group (see References of the samples column). All samples (including the previously tested specimens) were re-tested with PSV, PTV and PoAstV-3 RT-PCR screening assays prior to tRT-qPCR reactions. The table contains details of the analyzed animals/samples (AS: asymptomatic, PP: paraplegic) as well as results of RT-PCR (+: positive: visible band at the appropriate size range, -: negative: no visible band, or band(s) with non-appropriate size range) and RT-qPCR assays (-: negative: No Cq or Cq with >36.5; Samples with Cq values ≤ 36.5 were considered as RT-qPCR positive). Seq +: number of true-positive samples confirmed by Sanger-sequencing, Seq-: false positive (either non-viral sequences or non-sequenceable). Ambiguous samples (either RT-qPCR + / RT-PCR - or RT-qPCR - / RT-PCR +) are highlighted with red (PSV), green (PTV) or blue (PoAstV-3).

| Farm ID | Sample ID | Location       | Date (sampling) | Sample type | PSV-FAM | PTV-SUN | PoAstV3-Cy5 |
|---------|-----------|----------------|-----------------|-------------|---------|---------|-------------|
| S105    | S105_1    | Sajószöged     | 5.24.2018       | nasal swab  | -       | -       | -           |
|         | S105_2    | Sajószöged     | 5.24.2018       | nasal swab  | -       | -       | 34.55       |
|         | S105_3    | Sajószöged     | 5.24.2018       | nasal swab  | -       | -       | -           |
|         | S105_4    | Sajószöged     | 5.24.2018       | nasal swab  | -       | -       | -           |
|         | S105_6    | Sajószöged     | 5.24.2018       | nasal swab  | -       | -       | -           |
|         | S105_8    | Sajószöged     | 5.24.2018       | nasal swab  | -       | -       | -           |
|         | S105_9    | Sajószöged     | 5.24.2018       | nasal swab  | -       | -       | 34.73       |
|         | S105_10   | Sajószöged     | 5.24.2018       | nasal swab  | -       | -       | -           |
|         | S105_11   | Sajószöged     | 5.24.2018       | nasal swab  | -       | 35.69   | 33.47       |
|         | S105_12   | Sajószöged     | 5.24.2018       | nasal swab  | -       | -       | 33.54       |
|         | S105_13   | Sajószöged     | 5.24.2018       | nasal swab  | -       | -       | -           |
|         | S105_14   | Sajószöged     | 5.24.2018       | nasal swab  | -       | -       | -           |
|         | S105_15   | Sajószöged     | 5.24.2018       | nasal swab  | -       | -       | -           |
| S126    | S126_1    | Szarvas        | 6.5.2018        | nasal swab  | -       | -       | -           |
|         | S126_2    | Szarvas        | 6.5.2018        | nasal swab  | -       | -       | -           |
|         | S126_3    | Szarvas        | 6.5.2018        | nasal swab  | -       | -       | -           |
|         | S126_5    | Szarvas        | 6.5.2018        | nasal swab  | -       | -       | -           |
|         | S126_7    | Szarvas        | 6.5.2018        | nasal swab  | -       | -       | -           |
|         | S126_8    | Szarvas        | 6.5.2018        | nasal swab  | -       | -       | -           |
|         | S126_9    | Szarvas        | 6.5.2018        | nasal swab  | -       | -       | -           |
|         | S126_10   | Szarvas        | 6.5.2018        | nasal swab  | -       | -       | -           |
|         | S126_11   | Szarvas        | 6.5.2018        | nasal swab  | -       | -       | -           |
|         | S126_12   | Szarvas        | 6.5.2018        | nasal swab  | -       | -       | -           |
|         | S126_13   | Szarvas        | 6.5.2018        | nasal swab  | -       | -       | -           |
|         | S126_14   | Szarvas        | 6.5.2018        | nasal swab  | -       | -       | -           |
|         | S126_15   | Szarvas        | 6.5.2018        | nasal swab  | -       | -       | -           |
| S127    | S127_1    | Cibakháza      | 6.11.2018       | nasal swab  | -       | -       | 34.76       |
|         | S127_2    | Cibakháza      | 6.11.2018       | nasal swab  | -       | -       | -           |
|         | S127_3    | Cibakháza      | 6.11.2018       | nasal swab  | -       | -       | -           |
|         | S127_5    | Cibakháza      | 6.11.2018       | nasal swab  | -       | -       | -           |
|         | S127_10   | Cibakháza      | 6.11.2018       | nasal swab  | -       | -       | -           |
|         | S127_11   | Cibakháza      | 6.11.2018       | nasal swab  | -       | -       | 33.76       |
|         | S127_12   | Cibakháza      | 6.11.2018       | nasal swab  | -       | -       | 34.00       |
|         | S127_13   | Cibakháza      | 6.11.2018       | nasal swab  | -       | 32.72   | -           |
|         | S127_14   | Cibakháza      | 6.11.2018       | nasal swab  | -       | -       | -           |
|         | S127_15   | Cibakháza      | 6.11.2018       | nasal swab  | -       | -       | -           |
| S128    | S128_1    | Hajdúnánás     | 6.1.2018        | nasal swab  | -       | -       | -           |
|         | S128_2    | Hajdúnánás     | 6.1.2018        | nasal swab  | -       | -       | -           |
|         | S128_4    | Hajdúnánás     | 6.1.2018        | nasal swab  | -       | -       | 34.13       |
|         | S128_5    | Hajdúnánás     | 6.1.2018        | nasal swab  | -       | -       | 36.11       |
|         | S128_6    | Hajdúnánás     | 6.1.2018        | nasal swab  | -       | -       | -           |
|         | S128_7    | Hajdúnánás     | 6.1.2018        | nasal swab  | -       | -       | 34.66       |
|         | S128_10   | Hajdúnánás     | 6.1.2018        | nasal swab  | -       | -       | -           |
|         | S128_11   | Hajdúnánás     | 6.1.2018        | nasal swab  | -       | -       | -           |
|         | S128_12   | Hajdúnánás     | 6.1.2018        | nasal swab  | -       | -       | -           |
|         | S128_13   | Hajdúnánás     | 6.1.2018        | nasal swab  | -       | -       | 34.61       |
|         | S128_14   | Hajdúnánás     | 6.1.2018        | nasal swab  | -       | -       | -           |
|         | S128_15   | Hajdúnánás     | 6.1.2018        | nasal swab  | -       | -       | -           |
| S150    | S150_1    | Hajdószoboszló | 6.14.2018       | nasal swab  | -       | 36.46   | -           |
|         | S150_2    | Hajdószoboszló | 6.14.2018       | nasal swab  | -       | -       | -           |
|         | S150_3    | Hajdószoboszló | 6.14.2018       | nasal swab  | -       | 35.32   | -           |
|         | S150_4    | Hajdószoboszló | 6.14.2018       | nasal swab  | -       | 35.00   | -           |
|         | S150_5    | Hajdószoboszló | 6.14.2018       | nasal swab  | -       | 32.67   | -           |
|         | S150_6    | Hajdószoboszló | 6.14.2018       | nasal swab  | -       | 36.36   | -           |
|         | S150_7    | Hajdószoboszló | 6.14.2018       | nasal swab  | -       | -       | -           |
|         | S150_8    | Hajdószoboszló | 6.14.2018       | nasal swab  | -       | -       | -           |
|         | S150_9    | Hajdószoboszló | 6.14.2018       | nasal swab  | -       | -       | 34.30       |
|         | S150_10   | Hajdószoboszló | 6.14.2018       | nasal swab  | -       | 36.47   | 35.23       |
|         | S150_11   | Hajdószoboszló | 6.14.2018       | nasal swab  | -       | -       | 35.45       |
|         | S150_12   | Hajdószoboszló | 6.14.2018       | nasal swab  | -       | -       | -           |
|         | S150_13   | Hajdószoboszló | 6.14.2018       | nasal swab  | -       | -       | -           |
|         | S150_14   | Hajdószoboszló | 6.14.2018       | nasal swab  | -       | 35.10   | -           |
|         | S150_15   | Hajdószoboszló | 6.14.2018       | nasal swab  | -       | -       | -           |
| S151    | S151_1    | Kaba           | 6.12.2018       | nasal swab  | 34.00   | 36.17   | 34.04       |
|         | S151_3    | Kaba           | 6.12.2018       | nasal swab  | 36.00   | -       | -           |
|         | S151_4    | Kaba           | 6.12.2018       | nasal swab  | -       | -       | -           |
|         | S151_5    | Kaba           | 6.12.2018       | nasal swab  | -       | -       | -           |
|         | S151_6    | Kaba           | 6.12.2018       | nasal swab  | -       | -       | -           |
|         | S151_7    | Kaba           | 6.12.2018       | nasal swab  | -       | 32.05   | -           |
|         | S151_8    | Kaba           | 6.12.2018       | nasal swab  | -       | 28.28   | -           |
|         | S151_9    | Kaba           | 6.12.2018       | nasal swab  | -       | 29.64   | -           |

|      |         |                |           |            |   |       |       |
|------|---------|----------------|-----------|------------|---|-------|-------|
|      | S151_11 | Kaba           | 6.12.2018 | nasal swab | - | 34.33 | -     |
|      | S151_12 | Kaba           | 6.12.2018 | nasal swab | - | 31.30 | 35.16 |
|      | S151_13 | Kaba           | 6.12.2018 | nasal swab | - | 31.08 | 34.79 |
| S152 | S152_1  | Karcag         | 6.13.2018 | nasal swab | - | -     | -     |
|      | S152_2  | Karcag         | 6.13.2018 | nasal swab | - | -     | 35.67 |
|      | S152_3  | Karcag         | 6.13.2018 | nasal swab | - | -     | -     |
|      | S152_4  | Karcag         | 6.13.2018 | nasal swab | - | -     | -     |
|      | S152_5  | Karcag         | 6.13.2018 | nasal swab | - | -     | -     |
|      | S152_6  | Karcag         | 6.13.2018 | nasal swab | - | -     | -     |
|      | S152_7  | Karcag         | 6.13.2018 | nasal swab | - | -     | -     |
|      | S152_8  | Karcag         | 6.13.2018 | nasal swab | - | -     | -     |
|      | S152_9  | Karcag         | 6.13.2018 | nasal swab | - | -     | -     |
|      | S152_10 | Karcag         | 6.13.2018 | nasal swab | - | -     | -     |
|      | S152_11 | Karcag         | 6.13.2018 | nasal swab | - | -     | -     |
|      | S152_12 | Karcag         | 6.13.2018 | nasal swab | - | -     | 31.67 |
|      | S152_13 | Karcag         | 6.13.2018 | nasal swab | - | -     | -     |
|      | S152_14 | Karcag         | 6.13.2018 | nasal swab | - | -     | -     |
|      | S152_15 | Karcag         | 6.13.2018 | nasal swab | - | -     | -     |
| S153 | S153_1  | Biharnagybajom | 6.15.2018 | nasal swab | - | -     | 33.97 |
|      | S153_2  | Biharnagybajom | 6.15.2018 | nasal swab | - | -     | -     |
|      | S153_3  | Biharnagybajom | 6.15.2018 | nasal swab | - | -     | -     |
|      | S153_4  | Biharnagybajom | 6.15.2018 | nasal swab | - | -     | -     |
|      | S153_5  | Biharnagybajom | 6.15.2018 | nasal swab | - | -     | 34.67 |
|      | S153_6  | Biharnagybajom | 6.15.2018 | nasal swab | - | -     | -     |
|      | S153_7  | Biharnagybajom | 6.15.2018 | nasal swab | - | -     | -     |
|      | S153_8  | Biharnagybajom | 6.15.2018 | nasal swab | - | -     | 34.51 |
|      | S153_9  | Biharnagybajom | 6.15.2018 | nasal swab | - | -     | 35.68 |
|      | S153_10 | Biharnagybajom | 6.15.2018 | nasal swab | - | -     | -     |
|      | S153_11 | Biharnagybajom | 6.15.2018 | nasal swab | - | -     | 35.64 |
|      | S153_12 | Biharnagybajom | 6.15.2018 | nasal swab | - | -     | -     |
|      | S153_13 | Biharnagybajom | 6.15.2018 | nasal swab | - | -     | -     |
|      | S153_14 | Biharnagybajom | 6.15.2018 | nasal swab | - | -     | -     |
|      | S153_15 | Biharnagybajom | 6.15.2018 | nasal swab | - | -     | 34.51 |
| S154 | S154_1  | Nádudvar       | 6.11.2018 | nasal swab | - | -     | -     |
|      | S154_2  | Nádudvar       | 6.11.2018 | nasal swab | - | -     | -     |
|      | S154_3  | Nádudvar       | 6.11.2018 | nasal swab | - | -     | -     |
|      | S154_4  | Nádudvar       | 6.11.2018 | nasal swab | - | -     | -     |
|      | S154_5  | Nádudvar       | 6.11.2018 | nasal swab | - | -     | -     |
|      | S154_6  | Nádudvar       | 6.11.2018 | nasal swab | - | -     | 35.67 |
|      | S154_7  | Nádudvar       | 6.11.2018 | nasal swab | - | 31.68 | 35.11 |
|      | S154_8  | Nádudvar       | 6.11.2018 | nasal swab | - | 32.31 | -     |
|      | S154_9  | Nádudvar       | 6.11.2018 | nasal swab | - | 36.14 | -     |
|      | S154_10 | Nádudvar       | 6.11.2018 | nasal swab | - | -     | -     |
|      | S154_11 | Nádudvar       | 6.11.2018 | nasal swab | - | -     | -     |
|      | S154_12 | Nádudvar       | 6.11.2018 | nasal swab | - | -     | -     |
|      | S154_13 | Nádudvar       | 6.11.2018 | nasal swab | - | -     | -     |
|      | S154_14 | Nádudvar       | 6.11.2018 | nasal swab | - | -     | 34.39 |
|      | S154_15 | Nádudvar       | 6.11.2018 | nasal swab | - | -     | -     |
| S155 | S155_1  | Nádudvar       | 6.15.2018 | nasal swab | - | -     | -     |
|      | S155_2  | Nádudvar       | 6.15.2018 | nasal swab | - | -     | 34.74 |
|      | S155_3  | Nádudvar       | 6.15.2018 | nasal swab | - | -     | -     |
|      | S155_4  | Nádudvar       | 6.15.2018 | nasal swab | - | -     | 34.72 |
|      | S155_6  | Nádudvar       | 6.15.2018 | nasal swab | - | -     | -     |
|      | S155_7  | Nádudvar       | 6.15.2018 | nasal swab | - | 36.26 | -     |
|      | S155_8  | Nádudvar       | 6.15.2018 | nasal swab | - | -     | -     |
|      | S155_9  | Nádudvar       | 6.15.2018 | nasal swab | - | -     | -     |
|      | S155_10 | Nádudvar       | 6.15.2018 | nasal swab | - | -     | 35.34 |
|      | S155_11 | Nádudvar       | 6.15.2018 | nasal swab | - | -     | -     |
|      | S155_12 | Nádudvar       | 6.15.2018 | nasal swab | - | -     | -     |
|      | S155_13 | Nádudvar       | 6.15.2018 | nasal swab | - | -     | -     |
|      | S155_14 | Nádudvar       | 6.15.2018 | nasal swab | - | -     | -     |
|      | S155_15 | Nádudvar       | 6.15.2018 | nasal swab | - | -     | 35.98 |
| S156 | S156_1  | Püspökladány   | 6.12.2018 | nasal swab | - | -     | -     |
|      | S156_2  | Püspökladány   | 6.12.2018 | nasal swab | - | -     | -     |
|      | S156_3  | Püspökladány   | 6.12.2018 | nasal swab | - | -     | 33.85 |
|      | S156_4  | Püspökladány   | 6.12.2018 | nasal swab | - | -     | -     |
|      | S156_5  | Püspökladány   | 6.12.2018 | nasal swab | - | -     | -     |
|      | S156_6  | Püspökladány   | 6.12.2018 | nasal swab | - | -     | -     |
|      | S156_7  | Püspökladány   | 6.12.2018 | nasal swab | - | -     | -     |
|      | S156_8  | Püspökladány   | 6.12.2018 | nasal swab | - | -     | 35.75 |
|      | S156_9  | Püspökladány   | 6.12.2018 | nasal swab | - | -     | -     |
|      | S156_10 | Püspökladány   | 6.12.2018 | nasal swab | - | -     | -     |

|      |         |              |           |            |       |       |       |
|------|---------|--------------|-----------|------------|-------|-------|-------|
|      | S156_11 | Püspökladány | 6.12.2018 | nasal swab | -     | -     | -     |
|      | S156_12 | Püspökladány | 6.12.2018 | nasal swab | -     | -     | -     |
|      | S156_13 | Püspökladány | 6.12.2018 | nasal swab | -     | -     | -     |
|      | S156_14 | Püspökladány | 6.12.2018 | nasal swab | -     | -     | -     |
|      | S156_15 | Püspökladány | 6.12.2018 | nasal swab | -     | -     | -     |
| S157 | S157_1  | Füzesgyarmat | 6.16.2018 | nasal swab | 34.17 | 33.60 | -     |
|      | S157_2  | Füzesgyarmat | 6.16.2018 | nasal swab | 35.89 | 34.50 | -     |
|      | S157_3  | Füzesgyarmat | 6.16.2018 | nasal swab | -     | -     | -     |
|      | S157_4  | Füzesgyarmat | 6.16.2018 | nasal swab | -     | -     | -     |
|      | S157_5  | Füzesgyarmat | 6.16.2018 | nasal swab | -     | 33.54 | -     |
|      | S157_6  | Füzesgyarmat | 6.16.2018 | nasal swab | 28.11 | 33.37 | -     |
|      | S157_7  | Füzesgyarmat | 6.16.2018 | nasal swab | 33.92 | -     | -     |
|      | S157_8  | Füzesgyarmat | 6.16.2018 | nasal swab | 32.64 | -     | -     |
|      | S157_9  | Füzesgyarmat | 6.16.2018 | nasal swab | -     | 36.39 | 34.60 |
|      | S157_10 | Füzesgyarmat | 6.16.2018 | nasal swab | -     | 35.43 | 34.40 |
|      | S157_11 | Füzesgyarmat | 6.16.2018 | nasal swab | -     | -     | -     |
|      | S157_12 | Füzesgyarmat | 6.16.2018 | nasal swab | 33.91 | -     | 33.75 |
|      | S157_13 | Füzesgyarmat | 6.16.2018 | nasal swab | 29.10 | -     | -     |
|      | S157_14 | Füzesgyarmat | 6.16.2018 | nasal swab | -     | -     | -     |
|      | S157_15 | Füzesgyarmat | 6.16.2018 | nasal swab | 34.43 | -     | -     |
| S159 | S159_1  | Kocs         | 6.13.2018 | nasal swab | -     | -     | 34.80 |
|      | S159_2  | Kocs         | 6.13.2018 | nasal swab | -     | -     | -     |
|      | S159_3  | Kocs         | 6.13.2018 | nasal swab | -     | -     | -     |
|      | S159_4  | Kocs         | 6.13.2018 | nasal swab | -     | -     | -     |
|      | S159_5  | Kocs         | 6.13.2018 | nasal swab | -     | -     | -     |
|      | S159_7  | Kocs         | 6.13.2018 | nasal swab | -     | -     | -     |
|      | S159_8  | Kocs         | 6.13.2018 | nasal swab | -     | -     | -     |
|      | S159_9  | Kocs         | 6.13.2018 | nasal swab | -     | -     | 35.82 |
|      | S159_10 | Kocs         | 6.13.2018 | nasal swab | -     | -     | -     |
|      | S159_11 | Kocs         | 6.13.2018 | nasal swab | -     | -     | 32.61 |
|      | S159_12 | Kocs         | 6.13.2018 | nasal swab | -     | -     | -     |
|      | S159_13 | Kocs         | 6.13.2018 | nasal swab | -     | -     | -     |
|      | S159_14 | Kocs         | 6.13.2018 | nasal swab | -     | -     | -     |
|      | S159_15 | Kocs         | 6.13.2018 | nasal swab | -     | -     | -     |
| S162 | S162_2  | Fadd         | 6.18.2018 | nasal swab | 32.92 | 36.26 | 33.87 |
|      | S162_4  | Fadd         | 6.18.2018 | nasal swab | -     | -     | -     |
|      | S162_5  | Fadd         | 6.18.2018 | nasal swab | 32.73 | 36.50 | -     |
|      | S162_6  | Fadd         | 6.18.2018 | nasal swab | 33.41 | -     | -     |
|      | S162_7  | Fadd         | 6.18.2018 | nasal swab | -     | -     | 35.07 |
|      | S162_11 | Fadd         | 6.18.2018 | nasal swab | -     | -     | -     |
|      | S162_12 | Fadd         | 6.18.2018 | nasal swab | 36.24 | -     | 34.24 |
|      | S162_13 | Fadd         | 6.18.2018 | nasal swab | -     | -     | -     |
|      | S162_14 | Fadd         | 6.18.2018 | nasal swab | -     | -     | -     |
| S163 | S163_1  | Dunaszekcső  | 6.25.2018 | nasal swab | 32.68 | -     | -     |
|      | S163_2  | Dunaszekcső  | 6.25.2018 | nasal swab | 35.50 | -     | -     |
|      | S163_3  | Dunaszekcső  | 6.25.2018 | nasal swab | 35.17 | -     | -     |
|      | S163_4  | Dunaszekcső  | 6.25.2018 | nasal swab | -     | -     | -     |
|      | S163_5  | Dunaszekcső  | 6.25.2018 | nasal swab | -     | -     | -     |
|      | S163_6  | Dunaszekcső  | 6.25.2018 | nasal swab | -     | -     | -     |
|      | S163_7  | Dunaszekcső  | 6.25.2018 | nasal swab | -     | -     | -     |
|      | S163_8  | Dunaszekcső  | 6.25.2018 | nasal swab | -     | -     | -     |
|      | S163_9  | Dunaszekcső  | 6.25.2018 | nasal swab | -     | -     | -     |
|      | S163_10 | Dunaszekcső  | 6.25.2018 | nasal swab | -     | -     | -     |
| S164 | S164_1  | Dávod        | 6.27.2018 | nasal swab | 30.90 | 34.94 | -     |
|      | S164_2  | Dávod        | 6.27.2018 | nasal swab | 35.80 | -     | 34.05 |
|      | S164_3  | Dávod        | 6.27.2018 | nasal swab | -     | -     | -     |
|      | S164_4  | Dávod        | 6.27.2018 | nasal swab | -     | -     | -     |
|      | S164_5  | Dávod        | 6.27.2018 | nasal swab | -     | -     | 34.55 |
|      | S164_6  | Dávod        | 6.27.2018 | nasal swab | -     | -     | -     |
|      | S164_7  | Dávod        | 6.27.2018 | nasal swab | -     | -     | -     |
|      | S164_8  | Dávod        | 6.27.2018 | nasal swab | -     | -     | 33.73 |
|      | S164_9  | Dávod        | 6.27.2018 | nasal swab | -     | 35.52 | 33.89 |
|      | S164_10 | Dávod        | 6.27.2018 | nasal swab | -     | -     | -     |
|      | S164_11 | Dávod        | 6.27.2018 | nasal swab | -     | -     | -     |
|      | S164_12 | Dávod        | 6.27.2018 | nasal swab | -     | -     | -     |
|      | S164_13 | Dávod        | 6.27.2018 | nasal swab | -     | -     | -     |
|      | S164_14 | Dávod        | 6.27.2018 | nasal swab | -     | -     | -     |
|      | S164_15 | Dávod        | 6.27.2018 | nasal swab | -     | -     | 34.04 |
| S165 | S165_1  | Óalmás       | 6.28.2018 | nasal swab | -     | -     | 34.72 |
|      | S165_2  | Óalmás       | 6.28.2018 | nasal swab | -     | -     | -     |
|      | S165_3  | Óalmás       | 6.28.2018 | nasal swab | -     | -     | -     |
|      | S165_4  | Óalmás       | 6.28.2018 | nasal swab | -     | -     | -     |



|      |         |          |           |            |   |       |       |
|------|---------|----------|-----------|------------|---|-------|-------|
|      | S165_5  | Óalmás   | 6.28.2018 | nasal swab | - | -     | 34.67 |
|      | S165_6  | Óalmás   | 6.28.2018 | nasal swab | - | 28.27 | -     |
|      | S165_7  | Óalmás   | 6.28.2018 | nasal swab | - | 32.27 | 34.95 |
|      | S165_8  | Óalmás   | 6.28.2018 | nasal swab | - | 34.52 | -     |
|      | S165_9  | Óalmás   | 6.28.2018 | nasal swab | - | 33.46 | 33.17 |
|      | S165_10 | Óalmás   | 6.28.2018 | nasal swab | - | 33.88 | -     |
|      | S165_11 | Óalmás   | 6.28.2018 | nasal swab | - | -     | -     |
|      | S165_12 | Óalmás   | 6.28.2018 | nasal swab | - | 34.08 | -     |
|      | S165_13 | Óalmás   | 6.28.2018 | nasal swab | - | -     | -     |
|      | S165_14 | Óalmás   | 6.28.2018 | nasal swab | - | -     | -     |
|      | S165_15 | Óalmás   | 6.28.2018 | nasal swab | - | 36.24 | 34.72 |
| S166 | S166_1  | Somberek | 6.27.2018 | nasal swab | - | -     | -     |
|      | S166_2  | Somberek | 6.27.2018 | nasal swab | - | -     | -     |
|      | S166_3  | Somberek | 6.27.2018 | nasal swab | - | -     | -     |
|      | S166_4  | Somberek | 6.27.2018 | nasal swab | - | -     | -     |
|      | S166_5  | Somberek | 6.27.2018 | nasal swab | - | -     | -     |
|      | S166_6  | Somberek | 6.27.2018 | nasal swab | - | -     | -     |
|      | S166_7  | Somberek | 6.27.2018 | nasal swab | - | -     | -     |
|      | S166_8  | Somberek | 6.27.2018 | nasal swab | - | -     | -     |
|      | S166_9  | Somberek | 6.27.2018 | nasal swab | - | -     | -     |
|      | S166_10 | Somberek | 6.27.2018 | nasal swab | - | -     | -     |
|      | S166_11 | Somberek | 6.27.2018 | nasal swab | - | -     | -     |
|      | S166_12 | Somberek | 6.27.2018 | nasal swab | - | -     | -     |
|      | S166_13 | Somberek | 6.27.2018 | nasal swab | - | -     | -     |
|      | S166_14 | Somberek | 6.27.2018 | nasal swab | - | -     | -     |
|      | S166_15 | Somberek | 6.27.2018 | nasal swab | - | -     | -     |
| S167 | S167_1  | Mohács   | 6.25.2018 | nasal swab | - | -     | -     |
|      | S167_2  | Mohács   | 6.25.2018 | nasal swab | - | -     | -     |
|      | S167_3  | Mohács   | 6.25.2018 | nasal swab | - | -     | -     |
|      | S167_4  | Mohács   | 6.25.2018 | nasal swab | - | -     | -     |
|      | S167_5  | Mohács   | 6.25.2018 | nasal swab | - | -     | -     |
|      | S167_6  | Mohács   | 6.25.2018 | nasal swab | - | -     | 34.82 |
|      | S167_7  | Mohács   | 6.25.2018 | nasal swab | - | 34.38 | -     |
|      | S167_8  | Mohács   | 6.25.2018 | nasal swab | - | -     | -     |
|      | S167_9  | Mohács   | 6.25.2018 | nasal swab | - | -     | 35.63 |
|      | S167_10 | Mohács   | 6.25.2018 | nasal swab | - | -     | -     |
|      | S167_11 | Mohács   | 6.25.2018 | nasal swab | - | -     | 34.12 |
|      | S167_12 | Mohács   | 6.25.2018 | nasal swab | - | -     | -     |
|      | S167_13 | Mohács   | 6.25.2018 | nasal swab | - | 34.10 | -     |
|      | S167_14 | Mohács   | 6.25.2018 | nasal swab | - | -     | -     |
| S168 | S168_1  | Újpetre  | 6.25.2018 | nasal swab | - | -     | -     |
|      | S168_2  | Újpetre  | 6.25.2018 | nasal swab | - | -     | -     |
|      | S168_3  | Újpetre  | 6.25.2018 | nasal swab | - | -     | -     |
|      | S168_4  | Újpetre  | 6.25.2018 | nasal swab | - | -     | -     |
|      | S168_5  | Újpetre  | 6.25.2018 | nasal swab | - | -     | -     |
|      | S168_6  | Újpetre  | 6.25.2018 | nasal swab | - | -     | -     |
|      | S168_7  | Újpetre  | 6.25.2018 | nasal swab | - | -     | -     |
|      | S168_8  | Újpetre  | 6.25.2018 | nasal swab | - | -     | 33.76 |
|      | S168_9  | Újpetre  | 6.25.2018 | nasal swab | - | -     | -     |
|      | S168_10 | Újpetre  | 6.25.2018 | nasal swab | - | -     | -     |
|      | S168_11 | Újpetre  | 6.25.2018 | nasal swab | - | -     | -     |
|      | S168_12 | Újpetre  | 6.25.2018 | nasal swab | - | -     | 34.41 |
|      | S168_15 | Újpetre  | 6.25.2018 | nasal swab | - | -     | -     |
| S169 | S169_1  | Töttös   | 6.25.2018 | nasal swab | - | -     | -     |
|      | S169_2  | Töttös   | 6.25.2018 | nasal swab | - | 33.69 | -     |
|      | S169_3  | Töttös   | 6.25.2018 | nasal swab | - | 36.17 | 34.71 |
|      | S169_4  | Töttös   | 6.25.2018 | nasal swab | - | -     | -     |
|      | S169_5  | Töttös   | 6.25.2018 | nasal swab | - | -     | -     |
|      | S169_6  | Töttös   | 6.25.2018 | nasal swab | - | -     | -     |
|      | S169_7  | Töttös   | 6.25.2018 | nasal swab | - | -     | -     |
|      | S169_8  | Töttös   | 6.25.2018 | nasal swab | - | -     | -     |
|      | S169_9  | Töttös   | 6.25.2018 | nasal swab | - | -     | 34.65 |
|      | S169_10 | Töttös   | 6.25.2018 | nasal swab | - | -     | -     |
|      | S169_11 | Töttös   | 6.25.2018 | nasal swab | - | -     | -     |
|      | S169_12 | Töttös   | 6.25.2018 | nasal swab | - | -     | -     |
|      | S169_13 | Töttös   | 6.25.2018 | nasal swab | - | -     | -     |
|      | S169_14 | Töttös   | 6.25.2018 | nasal swab | - | -     | -     |
|      | S169_15 | Töttös   | 6.25.2018 | nasal swab | - | -     | -     |
| S216 | S216_1  | Szarvas  | 6.28.2018 | nasal swab | - | -     | -     |
|      | S216_2  | Szarvas  | 6.28.2018 | nasal swab | - | -     | -     |
|      | S216_3  | Szarvas  | 6.28.2018 | nasal swab | - | -     |       |
|      | S216_5  | Szarvas  | 6.28.2018 | nasal swab | - | -     | -     |



|      |         |           |            |            |       |       |       |
|------|---------|-----------|------------|------------|-------|-------|-------|
|      | S216_6  | Szarvas   | 6.28.2018  | nasal swab | -     | -     | -     |
|      | S216_7  | Szarvas   | 6.28.2018  | nasal swab | -     | -     | -     |
|      | S216_8  | Szarvas   | 6.28.2018  | nasal swab | -     | -     | -     |
|      | S216_9  | Szarvas   | 6.28.2018  | nasal swab | -     | -     |       |
|      | S216_10 | Szarvas   | 6.28.2018  | nasal swab | -     | -     | -     |
| S234 | S234_1  | Dávod     | 9.20.2018  | nasal swab | -     | -     | -     |
|      | S234_2  | Dávod     | 9.20.2018  | nasal swab | -     | -     | -     |
|      | S234_3  | Dávod     | 9.20.2018  | nasal swab | -     | -     | 32.14 |
|      | S234_4  | Dávod     | 9.20.2018  | nasal swab | -     | -     | -     |
|      | S234_5  | Dávod     | 9.20.2018  | nasal swab | -     | -     | -     |
|      | S234_6  | Dávod     | 9.20.2018  | nasal swab | -     | -     | -     |
|      | S234_7  | Dávod     | 9.20.2018  | nasal swab | -     | -     | -     |
|      | S234_8  | Dávod     | 9.20.2018  | nasal swab | -     | -     | -     |
|      | S234_9  | Dávod     | 9.20.2018  | nasal swab | -     | -     | -     |
|      | S234_10 | Dávod     | 9.20.2018  | nasal swab | -     | -     | 34.65 |
|      | S234_11 | Dávod     | 9.20.2018  | nasal swab | -     | -     | -     |
|      | S234_12 | Dávod     | 9.20.2018  | nasal swab | -     | -     | -     |
|      | S234_13 | Dávod     | 9.20.2018  | nasal swab | -     | 34.19 | 33.56 |
|      | S234_14 | Dávod     | 9.20.2018  | nasal swab | 35.83 | -     | -     |
|      | S234_15 | Dávod     | 9.20.2018  | nasal swab | -     | -     | -     |
|      | S234_16 | Dávod     | 9.20.2018  | nasal swab | -     | -     | -     |
|      | S234_17 | Dávod     | 9.20.2018  | nasal swab | 35.15 | -     | -     |
|      | S234_18 | Dávod     | 9.20.2018  | nasal swab | -     | -     | -     |
|      | S234_19 | Dávod     | 9.20.2018  | nasal swab | -     | -     | -     |
|      | S234_20 | Dávod     | 9.20.2018  | nasal swab | -     | -     | -     |
|      | S234_21 | Dávod     | 9.20.2018  | nasal swab | -     | -     | -     |
|      | S234_22 | Dávod     | 9.20.2018  | nasal swab | -     | -     | -     |
|      | S234_23 | Dávod     | 9.20.2018  | nasal swab | -     | -     | -     |
|      | S234_24 | Dávod     | 9.20.2018  | nasal swab | -     | -     | -     |
|      | S234_25 | Dávod     | 9.20.2018  | nasal swab | -     | -     | -     |
|      | S234_26 | Dávod     | 9.20.2018  | nasal swab | -     | -     | -     |
|      | S234_27 | Dávod     | 9.20.2018  | nasal swab | -     | -     | -     |
|      | S234_28 | Dávod     | 9.20.2018  | nasal swab | -     | -     | -     |
|      | S234_29 | Dávod     | 9.20.2018  | nasal swab | -     | -     | -     |
|      | S234_30 | Dávod     | 9.20.2018  | nasal swab | -     | -     | -     |
| S240 | S240_1  | Töttös    | 9.26.2018  | nasal swab | -     | -     | -     |
|      | S240_2  | Töttös    | 9.26.2018  | nasal swab | -     | -     | -     |
|      | S240_3  | Töttös    | 9.26.2018  | nasal swab | -     | -     | -     |
|      | S240_4  | Töttös    | 9.26.2018  | nasal swab | -     | -     | -     |
|      | S240_5  | Töttös    | 9.26.2018  | nasal swab | -     | -     | -     |
|      | S240_6  | Töttös    | 9.26.2018  | nasal swab | -     | -     | -     |
|      | S240_7  | Töttös    | 9.26.2018  | nasal swab | -     | -     | -     |
|      | S240_8  | Töttös    | 9.26.2018  | nasal swab | -     | -     | -     |
|      | S240_9  | Töttös    | 9.26.2018  | nasal swab | -     | -     | -     |
|      | S240_10 | Töttös    | 9.26.2018  | nasal swab | -     | -     | -     |
|      | S240_11 | Töttös    | 9.26.2018  | nasal swab | -     | -     | -     |
|      | S240_12 | Töttös    | 9.26.2018  | nasal swab | -     | -     | -     |
|      | S240_13 | Töttös    | 9.26.2018  | nasal swab | -     | -     | -     |
|      | S240_14 | Töttös    | 9.26.2018  | nasal swab | -     | -     | -     |
|      | S240_15 | Töttös    | 9.26.2018  | nasal swab | -     | -     | -     |
|      | S240_16 | Töttös    | 9.26.2018  | nasal swab | -     | -     | -     |
|      | S240_17 | Töttös    | 9.26.2018  | nasal swab | -     | -     | -     |
|      | S240_18 | Töttös    | 9.26.2018  | nasal swab | -     | -     | -     |
|      | S240_19 | Töttös    | 9.26.2018  | nasal swab | -     | -     | 35.45 |
|      | S240_20 | Töttös    | 9.26.2018  | nasal swab | -     | -     | 35.62 |
|      | S240_21 | Töttös    | 9.26.2018  | nasal swab | -     | -     | 34.53 |
|      | S240_22 | Töttös    | 9.26.2018  | nasal swab | -     | -     | -     |
|      | S240_23 | Töttös    | 9.26.2018  | nasal swab | -     | -     | -     |
|      | S240_24 | Töttös    | 9.26.2018  | nasal swab | 30.41 | -     | -     |
|      | S240_25 | Töttös    | 9.26.2018  | nasal swab | -     | -     | -     |
|      | S240_26 | Töttös    | 9.26.2018  | nasal swab | -     | -     | -     |
|      | S240_27 | Töttös    | 9.26.2018  | nasal swab | -     | -     | -     |
|      | S240_28 | Töttös    | 9.26.2018  | nasal swab | -     | -     | -     |
|      | S240_29 | Töttös    | 9.26.2018  | nasal swab | -     | -     | -     |
|      | S240_30 | Töttös    | 9.26.2018  | nasal swab | -     | -     | -     |
| SZV  | P1      | Szigetvár | 10.18.2017 | nasal swab | -     | -     | -     |
|      | P2      | Szigetvár | 10.18.2017 | nasal swab | -     | -     | -     |
|      | P3      | Szigetvár | 10.18.2017 | nasal swab | 34.77 | -     | -     |
|      | P4      | Szigetvár | 10.18.2017 | nasal swab | -     | -     | -     |
|      | P5      | Szigetvár | 10.18.2017 | nasal swab | -     | -     | -     |
|      | P6      | Szigetvár | 10.18.2017 | nasal swab | -     | -     | -     |
|      | P7      | Szigetvár | 10.18.2017 | nasal swab | -     | -     | -     |
|      | P8      | Szigetvár | 10.18.2017 | nasal swab | -     | -     | -     |

|     |           |             |            |            |       |       |       |
|-----|-----------|-------------|------------|------------|-------|-------|-------|
|     | P9        | Szigetvár   | 10.18.2017 | nasal swab | -     | -     | -     |
|     | P10       | Szigetvár   | 10.18.2017 | nasal swab | 35.49 | -     | -     |
|     | P11       | Szigetvár   | 10.18.2017 | nasal swab | -     | -     | -     |
|     | P12       | Szigetvár   | 10.18.2017 | nasal swab | -     | -     | -     |
|     | P13       | Szigetvár   | 10.18.2017 | nasal swab | 33.78 | -     | -     |
|     | P14       | Szigetvár   | 10.18.2017 | nasal swab | 34.77 | -     | -     |
|     | P15       | Szigetvár   | 10.18.2017 | nasal swab | 31.07 | -     | -     |
|     | P16       | Szigetvár   | 10.18.2017 | nasal swab | -     | -     | -     |
|     | P17       | Szigetvár   | 10.18.2017 | nasal swab | -     | -     | -     |
|     | P18       | Szigetvár   | 10.18.2017 | nasal swab | -     | -     | -     |
|     | P19       | Szigetvár   | 10.18.2017 | nasal swab | -     | -     | -     |
|     | P20       | Szigetvár   | 10.18.2017 | nasal swab | -     | -     | -     |
|     | P21       | Szigetvár   | 10.18.2017 | nasal swab | -     | -     | -     |
|     | P22       | Szigetvár   | 10.18.2017 | nasal swab | -     | -     | -     |
|     | P23       | Szigetvár   | 10.18.2017 | nasal swab | -     | -     | -     |
|     | P24       | Szigetvár   | 10.18.2017 | nasal swab | -     | -     | -     |
|     | O3        | Szigetvár   | 10.18.2017 | nasal swab | 33.13 | -     | -     |
|     | O4        | Szigetvár   | 10.18.2017 | nasal swab | -     | -     | -     |
|     | O7        | Szigetvár   | 10.18.2017 | nasal swab | -     | -     | 34.80 |
|     | O11       | Szigetvár   | 10.18.2017 | nasal swab | -     | -     | 34.44 |
|     | O21       | Szigetvár   | 10.18.2017 | nasal swab | -     | -     | -     |
| BSZ | Ó-1_01    | Bácsalmás   | 10.31.2017 | nasal swab | -     | -     | -     |
|     | Ó-1_02    | Bácsalmás   | 10.31.2017 | nasal swab | -     | -     | -     |
|     | Ó-1_03    | Bácsalmás   | 10.31.2017 | nasal swab | -     | -     | -     |
|     | Ó-1_05    | Bácsalmás   | 10.31.2017 | nasal swab | -     | -     | -     |
|     | Ó-1_06    | Bácsalmás   | 10.31.2017 | nasal swab | -     | -     | 34.02 |
|     | Ó-1_08    | Bácsalmás   | 10.31.2017 | nasal swab | -     | -     | 35.08 |
|     | Ó-1_K     | Bácsalmás   | 10.31.2017 | nasal swab | -     | -     | -     |
|     | Ó-1083_01 | Bácsalmás   | 10.31.2017 | nasal swab | -     | -     | -     |
|     | Ó-1083_02 | Bácsalmás   | 10.31.2017 | nasal swab | -     | -     | -     |
|     | Ó-1083_03 | Bácsalmás   | 10.31.2017 | nasal swab | -     | -     | -     |
|     | Ó-1083_04 | Bácsalmás   | 10.31.2017 | nasal swab | -     | -     | -     |
|     | Ó-1083_05 | Bácsalmás   | 10.31.2017 | nasal swab | -     | -     | -     |
|     | Ó-1083_06 | Bácsalmás   | 10.31.2017 | nasal swab | -     | -     | -     |
|     | Ó-1083_07 | Bácsalmás   | 10.31.2017 | nasal swab | -     | -     | -     |
|     | Ó-1083_08 | Bácsalmás   | 10.31.2017 | nasal swab | -     | -     | 35.08 |
|     | Ó-1083_09 | Bácsalmás   | 10.31.2017 | nasal swab | -     | 35.80 | 34.82 |
|     | Ó-1083_K  | Bácsalmás   | 10.31.2017 | nasal swab | -     | -     | -     |
|     | 4752_02   | Bácsalmás   | 10.31.2017 | nasal swab | -     | -     | 33.70 |
|     | 4752_03   | Bácsalmás   | 10.31.2017 | nasal swab | -     | -     | -     |
|     | 4752_04   | Bácsalmás   | 10.31.2017 | nasal swab | -     | -     | -     |
|     | 4752_05   | Bácsalmás   | 10.31.2017 | nasal swab | -     | -     | -     |
|     | 4752_06   | Bácsalmás   | 10.31.2017 | nasal swab | -     | -     | 34.13 |
|     | 4752_07   | Bácsalmás   | 10.31.2017 | nasal swab | -     | -     | -     |
|     | 4752_08   | Bácsalmás   | 10.31.2017 | nasal swab | -     | -     | 34.51 |
|     | 4752_09   | Bácsalmás   | 10.31.2017 | nasal swab | -     | -     | -     |
|     | 4752_K    | Bácsalmás   | 10.31.2017 | nasal swab | -     | -     | -     |
|     | 4758_01   | Bácsalmás   | 10.31.2017 | nasal swab | -     | -     | -     |
|     | 4758_02   | Bácsalmás   | 10.31.2017 | nasal swab | -     | -     | -     |
|     | 4758_03   | Bácsalmás   | 10.31.2017 | nasal swab | -     | -     | -     |
|     | 4758_05   | Bácsalmás   | 10.31.2017 | nasal swab | -     | -     | -     |
|     | 4758_07   | Bácsalmás   | 10.31.2017 | nasal swab | -     | -     | -     |
|     | 4758_08   | Bácsalmás   | 10.31.2017 | nasal swab | -     | -     | -     |
|     | 4758_09   | Bácsalmás   | 10.31.2017 | nasal swab | -     | -     | -     |
|     | 4758_K    | Bácsalmás   | 10.31.2017 | nasal swab | -     | -     | -     |
|     | 4760_01   | Bácsalmás   | 10.31.2017 | nasal swab | -     | -     | -     |
|     | 4760_02   | Bácsalmás   | 10.31.2017 | nasal swab | -     | -     | -     |
|     | 4760_03   | Bácsalmás   | 10.31.2017 | nasal swab | -     | -     | -     |
|     | 4760_04   | Bácsalmás   | 10.31.2017 | nasal swab | -     | -     | -     |
|     | 4760_05   | Bácsalmás   | 10.31.2017 | nasal swab | -     | -     | -     |
|     | 4760_07   | Bácsalmás   | 10.31.2017 | nasal swab | -     | -     | -     |
|     | 4760_09   | Bácsalmás   | 10.31.2017 | nasal swab | -     | 35.89 | -     |
|     | 4760_K    | Bácsalmás   | 10.31.2017 | nasal swab | -     | -     | -     |
| DSZ | DSZ-1_01K | Dunaszekcső | 11.16.2017 | nasal swab | -     | -     | -     |
|     | DSZ-1_02M | Dunaszekcső | 11.16.2017 | nasal swab | -     | -     | 33.11 |
|     | DSZ-1_04M | Dunaszekcső | 11.16.2017 | nasal swab | -     | -     | -     |
|     | DSZ-1_05M | Dunaszekcső | 11.16.2017 | nasal swab | -     | -     | 34.22 |
|     | DSZ-1_06M | Dunaszekcső | 11.16.2017 | nasal swab | -     | -     | -     |
|     | DSZ-1_08M | Dunaszekcső | 11.16.2017 | nasal swab | -     | -     | -     |
|     | DSZ-2_01  | Dunaszekcső | 11.16.2017 | nasal swab | -     | -     | -     |
|     | DSZ-2_02M | Dunaszekcső | 11.16.2017 | nasal swab | -     | -     | -     |
|     | DSZ-2_03M | Dunaszekcső | 11.16.2017 | nasal swab | -     | -     | 34.64 |
|     | DSZ-2_04M | Dunaszekcső | 11.16.2017 | nasal swab | -     | -     | -     |

|    |           |             |            |            |       |       |       |
|----|-----------|-------------|------------|------------|-------|-------|-------|
|    | DSZ-2_05M | Dunaszekcső | 11.16.2017 | nasal swab | -     | -     | -     |
|    | DSZ-2_06M | Dunaszekcső | 11.16.2017 | nasal swab | -     | -     | -     |
|    | DSZ-2_07M | Dunaszekcső | 11.16.2017 | nasal swab | -     | -     | 33.89 |
|    | DSZ-2_08M | Dunaszekcső | 11.16.2017 | nasal swab | -     | -     | -     |
|    | DSZ-3_01K | Dunaszekcső | 11.16.2017 | nasal swab | -     | -     | -     |
|    | DSZ-3_03M | Dunaszekcső | 11.16.2017 | nasal swab | -     | -     | 34.04 |
|    | DSZ-3_04M | Dunaszekcső | 11.16.2017 | nasal swab | -     | -     | 34.72 |
|    | DSZ-3_05M | Dunaszekcső | 11.16.2017 | nasal swab | -     | -     | -     |
|    | DSZ-3_06M | Dunaszekcső | 11.16.2017 | nasal swab | -     | -     | -     |
|    | DSZ-3_07M | Dunaszekcső | 11.16.2017 | nasal swab | -     | -     | -     |
|    | DSZ-4_01M | Dunaszekcső | 11.16.2017 | nasal swab | -     | -     | -     |
|    | DSZ-4_02M | Dunaszekcső | 11.16.2017 | nasal swab | -     | 35.84 | -     |
|    | DSZ-4_03  | Dunaszekcső | 11.16.2017 | nasal swab | -     | -     | -     |
|    | DSZ-4_04M | Dunaszekcső | 11.16.2017 | nasal swab | -     | -     | -     |
|    | DSZ-4_05  | Dunaszekcső | 11.16.2017 | nasal swab | -     | -     | -     |
|    | DSZ-4_06M | Dunaszekcső | 11.16.2017 | nasal swab | -     | -     | -     |
|    | DSZ-5_01M | Dunaszekcső | 11.16.2017 | nasal swab | -     | -     | -     |
|    | DSZ-5_02M | Dunaszekcső | 11.16.2017 | nasal swab | -     | -     | -     |
|    | DSZ-5_03M | Dunaszekcső | 11.16.2017 | nasal swab | -     | -     | -     |
|    | DSZ-5_04M | Dunaszekcső | 11.16.2017 | nasal swab | -     | -     | -     |
|    | DSZ-5_06M | Dunaszekcső | 11.16.2017 | nasal swab | -     | -     | -     |
| GD | GD_01     | Orosháza    | 9.15.2016  | nasal swab | -     | -     | -     |
|    | GD_02     | Orosháza    | 9.15.2016  | nasal swab | 34.52 | -     | -     |
|    | GD_03     | Orosháza    | 9.15.2016  | nasal swab | 31.43 | -     | -     |
|    | GD_04     | Orosháza    | 9.15.2016  | nasal swab | 36.41 | -     | -     |
|    | GD_05     | Orosháza    | 9.15.2016  | nasal swab | 31.68 | -     | 35.37 |
|    | GD_06     | Orosháza    | 9.15.2016  | nasal swab | 31.13 | -     | 34.42 |
|    | GD_07     | Orosháza    | 9.15.2016  | nasal swab | 31.15 | -     | 35.07 |
|    | GD_08     | Orosháza    | 9.15.2016  | nasal swab | -     | -     | -     |
|    | GD_09     | Orosháza    | 9.15.2016  | nasal swab | 33.19 | 35.56 | -     |
|    | GD_10     | Orosháza    | 9.15.2016  | nasal swab | 34.45 | -     | -     |
|    | GD0717_1A | Orosháza    | 6.07.2017  | nasal swab | 34.65 | 35.65 | -     |
|    | GD0717_2A | Orosháza    | 6.07.2017  | nasal swab | -     | -     | -     |
|    | GD0717_3A | Orosháza    | 6.07.2017  | nasal swab | -     | -     | -     |
|    | GD0717_1  | Orosháza    | 6.07.2017  | nasal swab | -     | -     | -     |
|    | GD0717_2  | Orosháza    | 6.07.2017  | nasal swab | -     | -     | -     |
|    | GD0717_4  | Orosháza    | 6.07.2017  | nasal swab | -     | -     | -     |
|    | GD0717_5  | Orosháza    | 6.07.2017  | nasal swab | -     | -     | -     |
|    | GD0717_7  | Orosháza    | 6.07.2017  | nasal swab | -     | -     | -     |
|    | GD0717_8  | Orosháza    | 6.07.2017  | nasal swab | -     | -     | -     |

**Table S3:** Results of porcine sapelovirus (PSV), poricne teschovirus (PTV) and porcine astrovirus type 3 (PoAstV3) RT-qPCR assays of N=473 nasal swabs collected in N=28 different Hungarian swine farms. FAM/SUN/Cy5: detection channels of the given virus. The table contains details of the farms/samples as well as measured Cq values (≤ 36.5). (-: negative: No Cq or Cq with >36.5; Samples with Cq values ≤ 36.5 were considered as RT-qPCR positive).

| Farm ID | Location   | Date (sampling) | Sample ID  | Sample type | Health status | PSV-FAM | PTV-SUN | PoAstV3-Cy5 |
|---------|------------|-----------------|------------|-------------|---------------|---------|---------|-------------|
| MB      | Bodony     | 20.03.2020      | MB-H-Agy   | Brain stem  | paraplegic    | -       | -       | -           |
| SS      | Somogysárd | 30.09.2019      | SS21-GV-Ny | Spinal cord | paraplegic    | -       | -       | -           |
|         | Somogysárd | 30.09.2019      | SS22-GV-Ny | Spinal cord | paraplegic    | -       | -       | -           |
|         | Somogysárd | 30.09.2019      | SS21-GV-H  | Spinal cord | paraplegic    | -       | -       | -           |
|         | Somogysárd | 30.09.2019      | SS22-GV-H  | Spinal cord | paraplegic    | -       | -       | -           |
|         | Somogysárd | 30.09.2019      | SS21-GV-K  | Spinal cord | paraplegic    | -       | -       | -           |
|         | Somogysárd | 30.09.2019      | SS22-GV-K  | Spinal cord | paraplegic    | -       | -       | -           |
|         | Somogysárd | 30.09.2019      | SS21-KV    | Cerebellum  | paraplegic    | -       | -       | -           |
|         | Somogysárd | 30.09.2019      | SS22-KV    | Cerebellum  | paraplegic    | -       | -       | -           |
|         | Somogysárd | 30.09.2019      | SS21-AV    | Brain stem  | paraplegic    | -       | -       | -           |
|         | Somogysárd | 30.09.2019      | SS22-AV    | Brain stem  | paraplegic    | -       | -       | -           |
| OR      | Orosháza   | 25.05.2021      | OR-B1-KA   | Cerebellum  | paraplegic    | -       | -       | -           |
|         | Orosháza   | 25.05.2021      | OR-B2-KA   | Cerebellum  | paraplegic    | -       | -       | -           |
|         | Orosháza   | 25.05.2021      | OR-B3-KA   | Cerebellum  | paraplegic    | -       | -       | -           |
|         | Orosháza   | 25.05.2021      | OR-B4-KA   | Cerebellum  | paraplegic    | -       | -       | -           |
|         | Orosháza   | 25.05.2021      | OR-B5-KA   | Cerebellum  | paraplegic    | -       | -       | -           |
|         | Orosháza   | 25.05.2021      | OR-B1-AGY  | Brain stem  | paraplegic    | -       | -       | -           |
|         | Orosháza   | 25.05.2021      | OR-B2-AGY  | Brain stem  | paraplegic    | -       | -       | -           |
|         | Orosháza   | 25.05.2021      | OR-B3-AGY  | Brain stem  | paraplegic    | -       | -       | -           |
|         | Orosháza   | 25.05.2021      | OR-B4-AGY  | Brain stem  | paraplegic    | -       | -       | -           |
|         | Orosháza   | 25.05.2021      | OR-B5-AGY  | Brain stem  | paraplegic    | -       | -       | -           |

**Table S4:** Results of porcine sapelovirus (PSV), porcine teschovirus (PTV) and porcine astrovirus type 3 (PoAstV3) RT-qPCR assays of N=21 samples from various sites of the central nervous system of N= 8 paraplegic pig with unknown aetiology. FAM/SUN/Cy5: detection channels of the given virus. The table contains details of the farms/samples as well as measured Cq values ( $\leq 36.5$ ). (-: negative: No Cq or Cq with  $>36.5$ ; Samples with Cq values  $\leq 36.5$  were considered as RT-qPCR positive).
