# Supplementary material for: Development and Large-Scale Testing of a Novel One-Step Triplex RT-qPCR Assay for Simultaneous Detection of “Neurotropic” Porcine Sapeloviruses, Teschoviruses (Picornaviridae) and Type 3 Porcine Astroviruses (Astroviridae) in Various Samples including Nasal Swabs
Source: Viruses. 2022 Mar 2;14(3):513. doi: 10.3390/v14030513 (PMC8952109; doi:10.3390/v14030513)
Supplement: Supplementary file 1 [file viruses-14-00513-s001.zip]

Archive with 4 entries (4 files):
- Figure S1 - viruses-1487148.pdf
- Supplemetary Table S1  - viruses-1487148.pdf
- Tables S2-S3-S4 - viruses-1487148.pdf
- Technical appendix - viruses-1487148.pdf
